# Supplementary material for: PTH induces bone loss via microbial-dependent expansion of intestinal TNF+ T cells and Th17 cells
Source: PubMed Central journal article supplement (PMC6981196; doi:10.1038/s41467-019-14148-4), 2020-01-24
Supplement: 41467_2019_14148_MOESM1_ESM.pdf [file 41467_2019_14148_MOESM1_ESM.pdf]

# **PTH INDUCES BONE LOSS VIA MICROBIAL-DEPENDENT EXPANSION OF INTESTINAL TNF<sup>+</sup> T CELLS AND TH17 CELLS**

Mingcan Yu et al

Supplemental figures

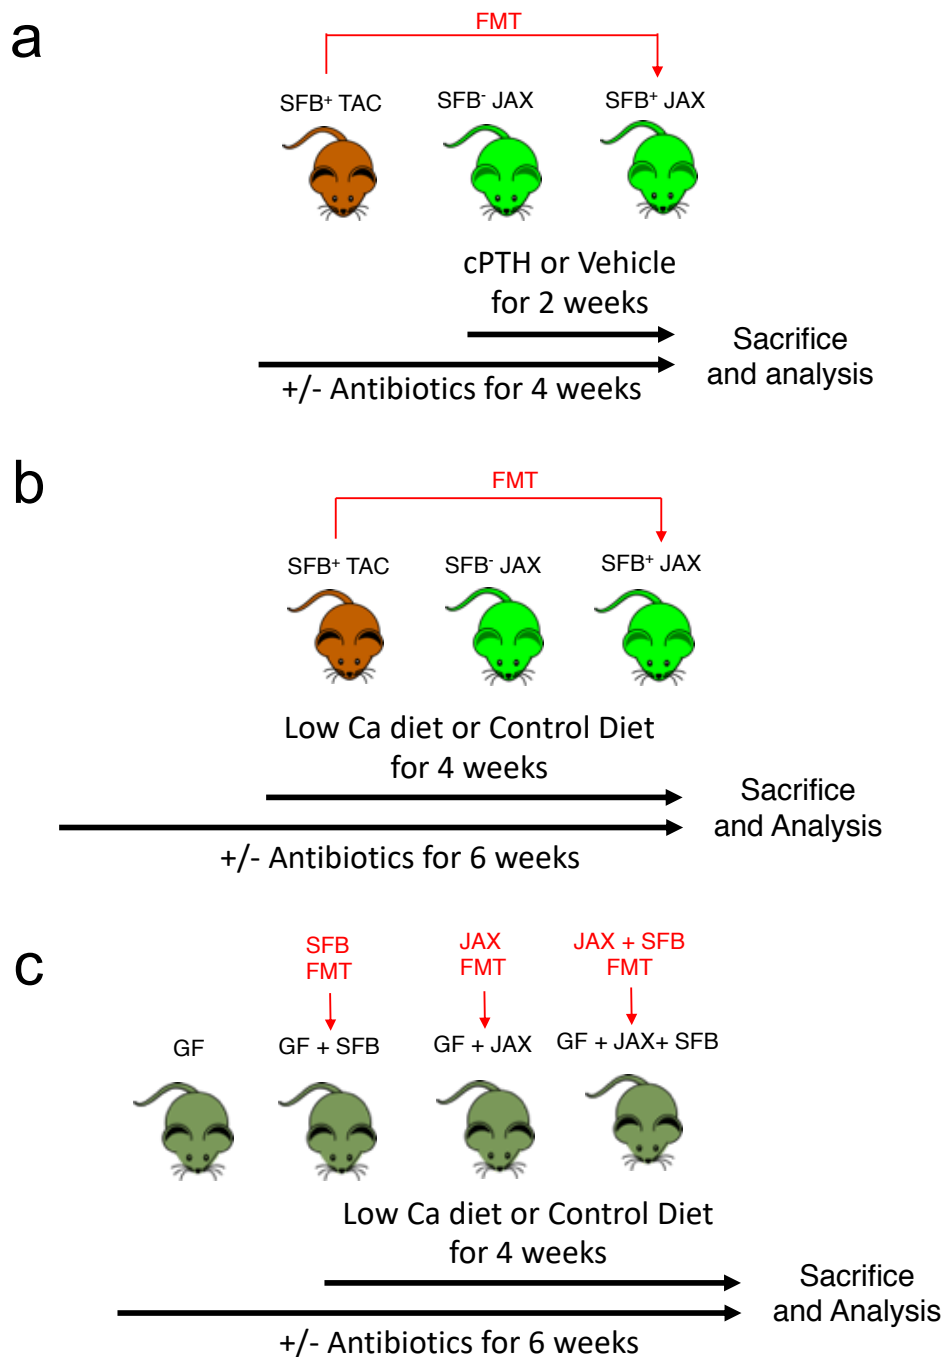

**Supplemental Figure 1. Diagrammatic representation of the experimental models.** **a.** Continuous PTH (cPTH) treatment as a model of primary hyperparathyroidism. SFB<sup>+</sup> JAX mice were generated by fecal microbiome transfer (FMT) that involves oral gavaging SFB<sup>-</sup> JAX mice with a liquid suspension of fecal pellets collected from SFB<sup>+</sup> TAC mice. **b.** Low calcium diet as a model of secondary hyperparathyroidism. SFB<sup>+</sup> JAX mice were generated by fecal microbiome transfer (FMT) that involves oral gavaging SFB<sup>-</sup> JAX mice with a liquid suspension of fecal pellets collected from SFB<sup>+</sup> TAC mice. **c.** Fecal microbiome transfer (FMT) as a model to investigate the specific role of SFB. Germ-free (GF) mice were subjected to FMTs to generate mice colonized exclusively with SFB. Controls included GF mice colonized with the SFB<sup>-</sup> JAX microbiota and mice colonized with both SFB and the SFB<sup>-</sup> JAX microbiota. The figure contains elements from Clipart Library (<http://clipart-library.com>).

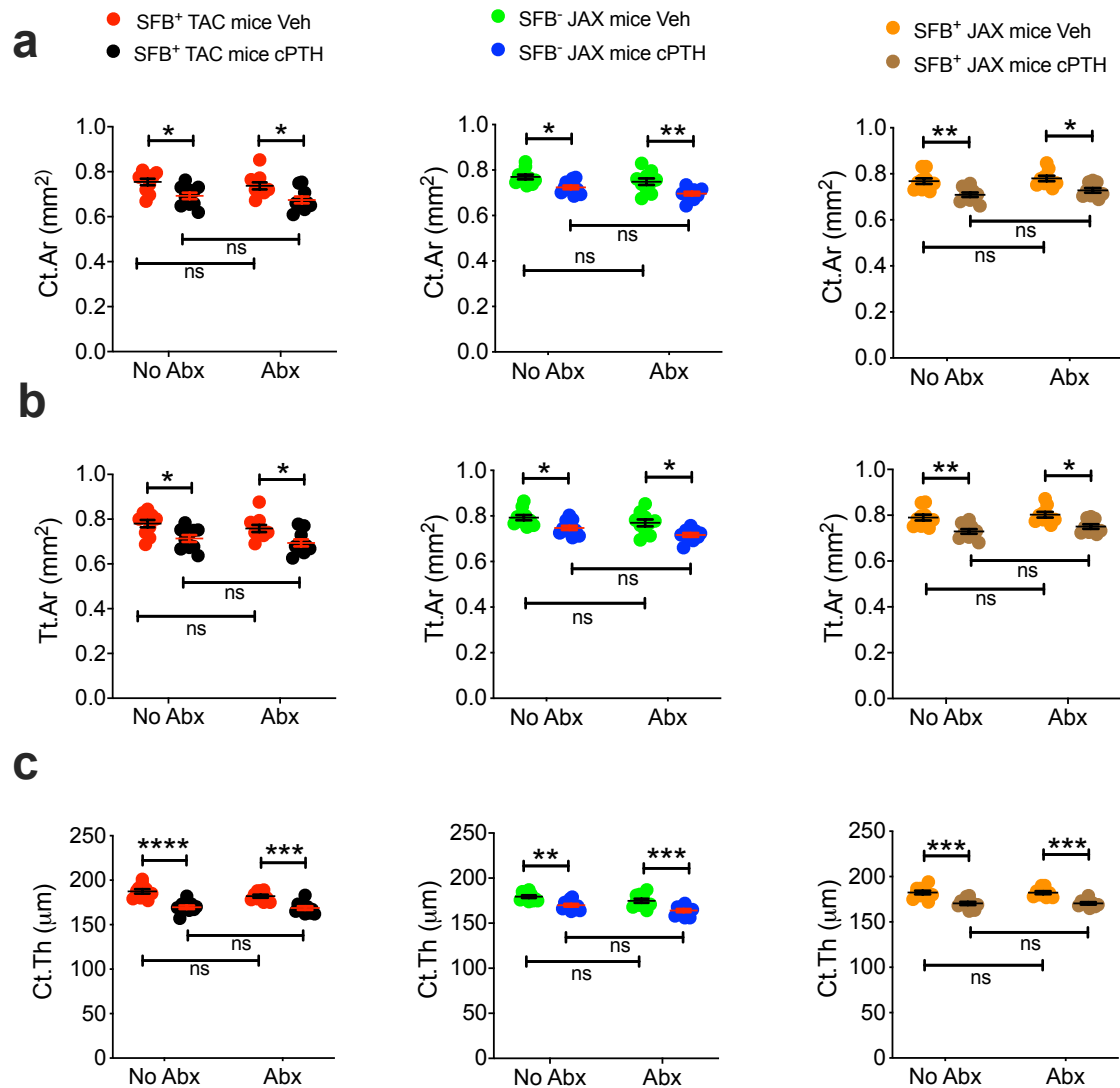

**Supplemental Figure 2. The microbiota is not required for cPTH treatment to alter cortical structure.** Cross-sectional measurements of femoral cortical structure by in vitro  $\mu$ CT scanning. SFB<sup>+</sup> and SFB<sup>-</sup> TAC and JAX mice were treated with vehicle or cPTH for 2 weeks and with antibiotics (Abx) or without antibiotics (No Abx). **a.** Cortical bone area (Ct.Ar), n= 9-11 mice per group. **b.** Total cross-sectional area inside the periosteal envelope (Tt.Ar), n= 9-11 mice per group. **c.** Average cortical thickness (Ct.Th), n= 9-11 mice per group. Data are expressed as Mean  $\pm$  SEM. All data were normally distributed according to the Shapiro-Wilk normality test and analyzed by two-way analysis-of-variance and post hoc tests applying the Bonferroni correction for multiple comparisons. \*= $p < 0.05$ , \*\*= $p < 0.01$ , \*\*\*= $p < 0.001$  and \*\*\*\*= $p < 0.0001$  compared to the indicated group. Source data are provided as a Source Data file.

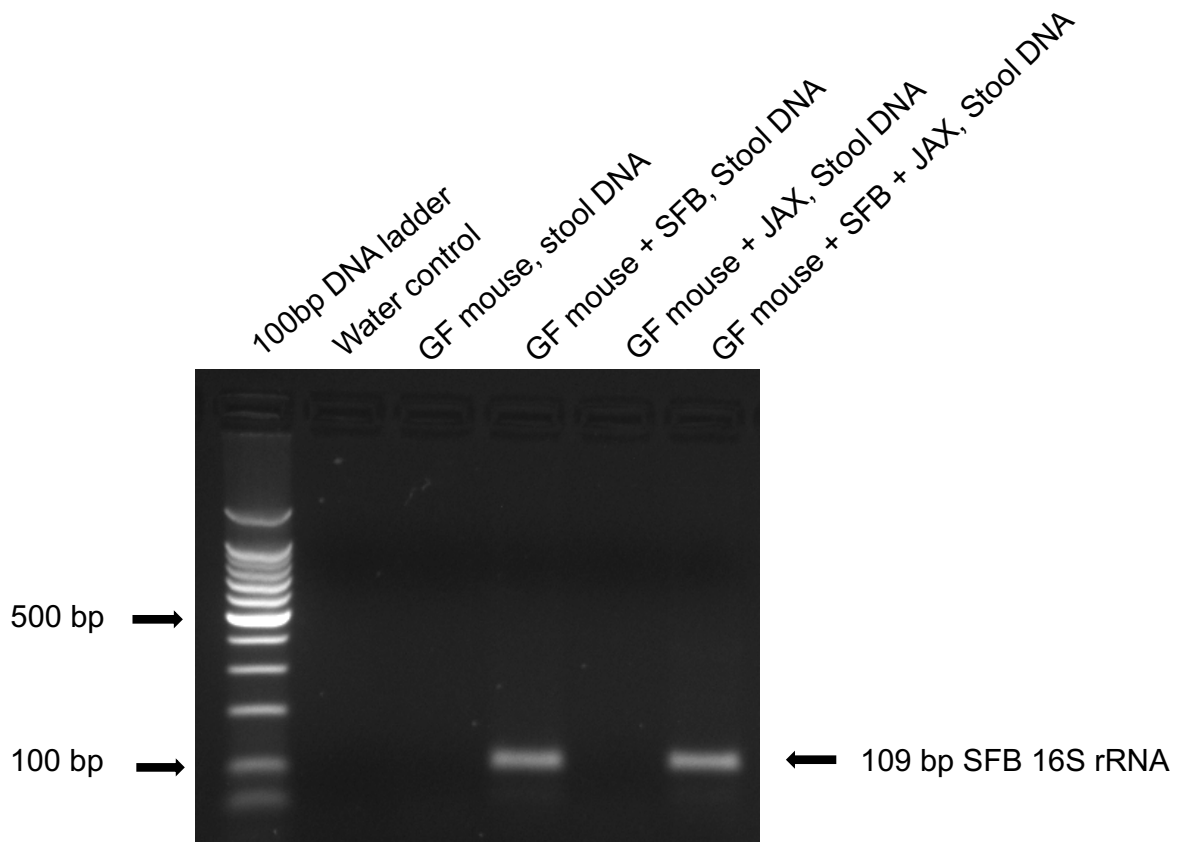

**Supplemental Figure 3. Detection of Segmented filamentous bacteria (SFB) in C57BL/6 mice.** Detection of SFB in fecal pellets collected from the indicated C57BL/6 mice using SFB-specific primers. PCR amplification was done using DNA purified from mouse pellets as template, and amplicons detected by electrophoresis using a 2% agarose gel. Fecal samples were collected from Germ-free (GF) mice, GF mice mono-colonized with SFB, GF colonized with SFB<sup>-</sup> JAX by fecal microbiome transplant (FMT), and GF mouse colonized with SFB<sup>-</sup> JAX by FMT and with SFB. Primers used for PCR are described in Supplemental Table 1.

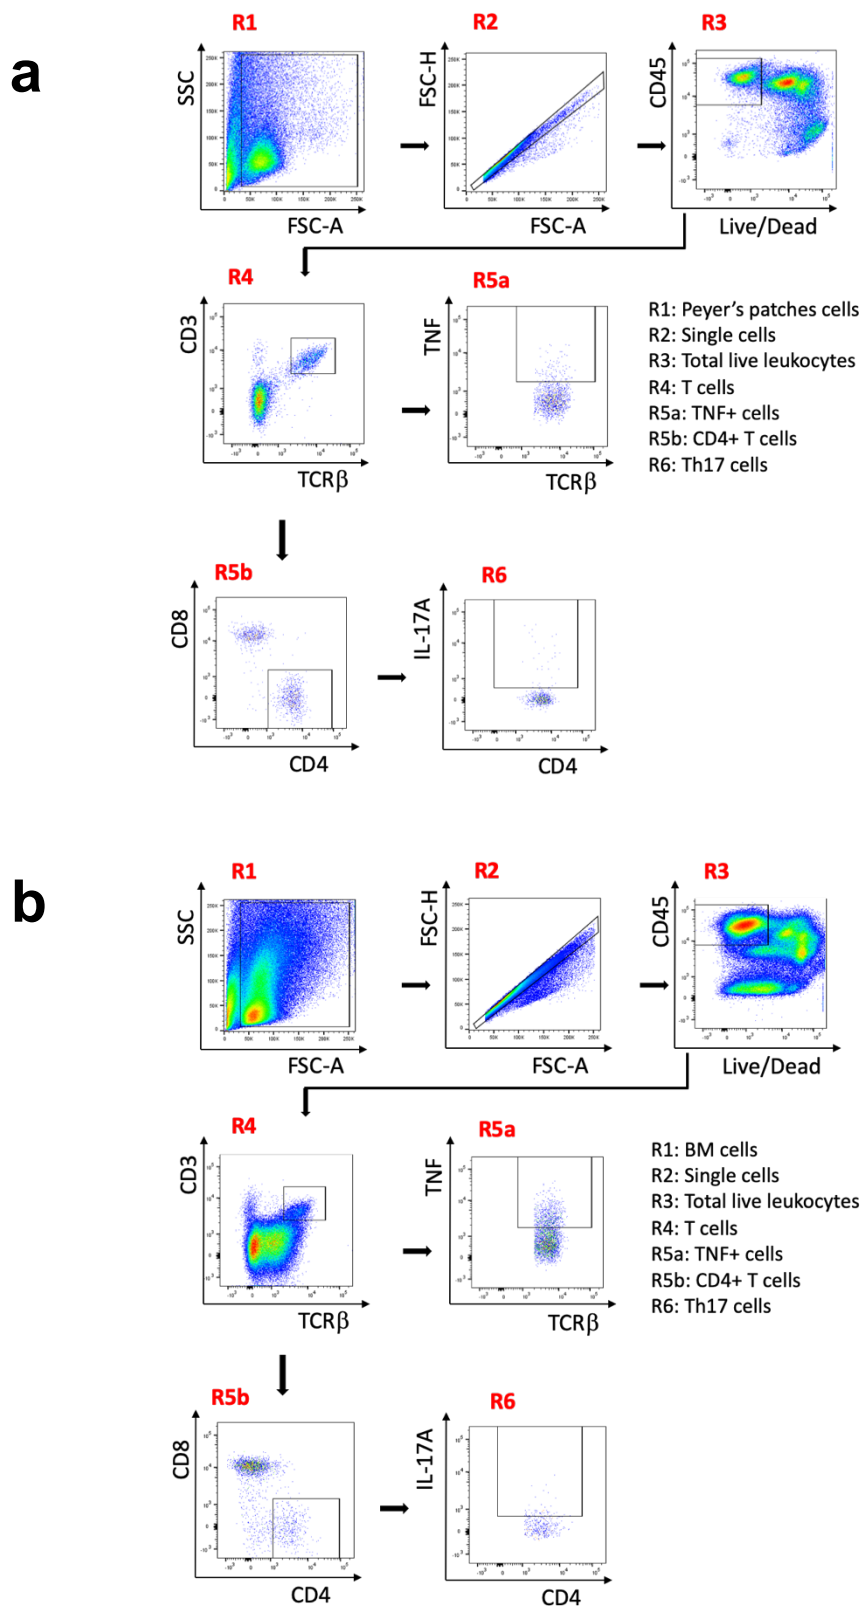

**Supplemental Figure 4. Gating strategy used to identify Payer's patches (Panel a) and BM (Panel b) TNF<sup>+</sup> T cells and Th17 cells.** Following red blood cells lysis, single cell suspensions were prepared from Payer's patches and BM and stained with antibodies to the indicated antigens and live/dead cell dye. Gated regions are numbered from R1 to R6. The figure shows one representative gating of flow cytometric plot.

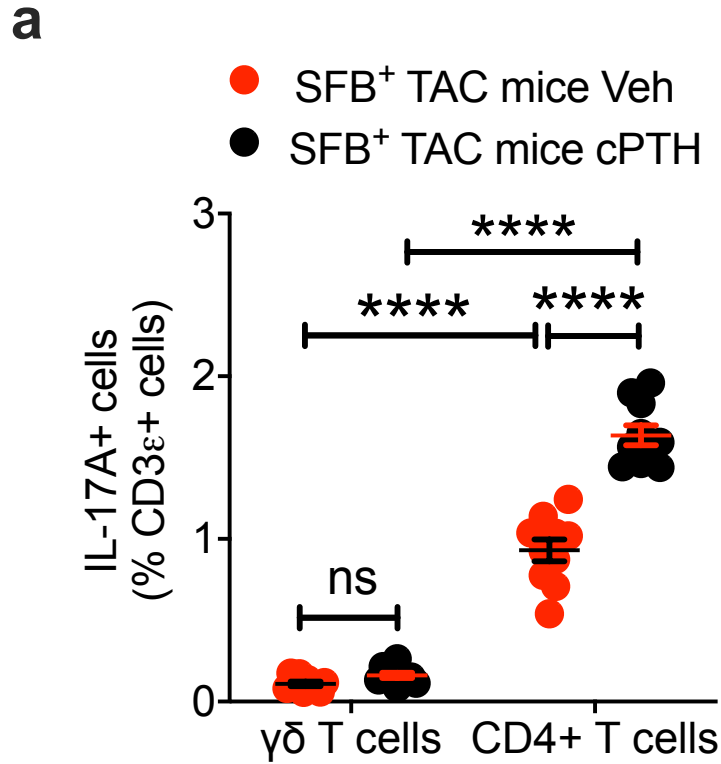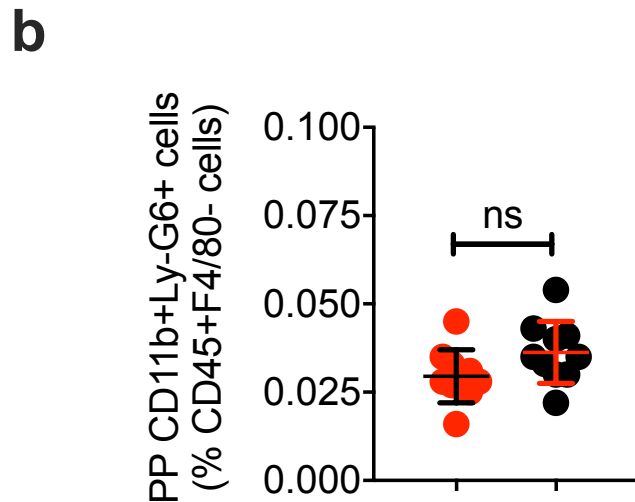

**Supplemental Figure 5. Effects of cPTH treatment on the relative frequency of PP IL-17A<sup>+</sup>  $\gamma\delta$  T cells, Th17 cells and neutrophils.** **a.** Relative frequency of PP IL-17A<sup>+</sup>  $\gamma\delta$  T cells and PP IL-17A<sup>+</sup> CD4<sup>+</sup> cells expressed as percentage of total T cells (CD3 $\epsilon$ <sup>+</sup> cells). **b.** Relative frequency of PP neutrophils. SFB<sup>+</sup> TAC mice were treated with cPTH for 2 weeks. n= 10 mice per group. Data are expressed as Mean  $\pm$  SEM. All data were normally distributed according to the Shapiro-Wilk normality test. Data in panel a were analyzed by two-way analysis-of-variance and post hoc tests applying the Bonferroni correction for multiple comparisons. Data in panel b were analyzed by unpaired t-tests. \*\*\*\*= p<0.0001 compared to the indicated group. Source data are provided as a Source Data file.

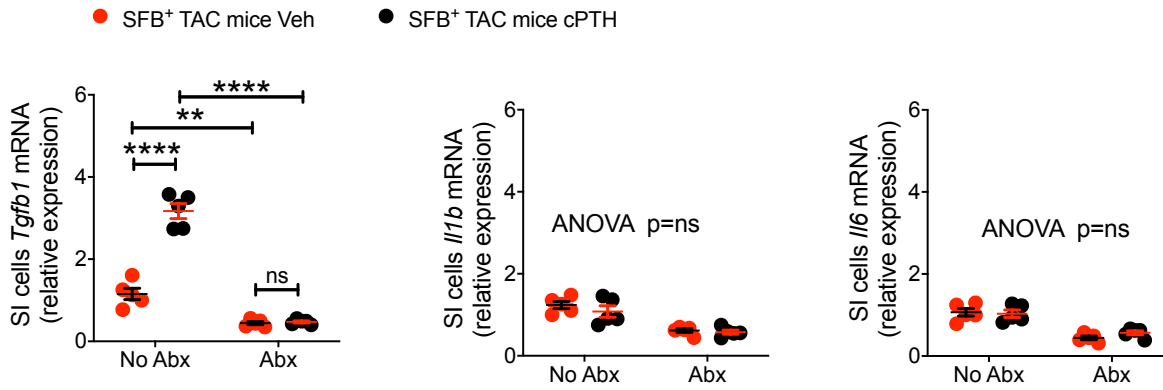

**Supplemental Figure 6. cPTH treatment increases SI cells mRNA expression of *TGFβ1*, but not that of *IL-1* and *IL-6*.** SFB<sup>+</sup> TAC mice treated with cPTH for 2 weeks and with antibiotics (Abx) or without antibiotics (No Abx). n= 5 mice per group. Data are expressed as Mean ± SEM. All data were normally distributed according to the Shapiro-Wilk normality test and analyzed by two-way analysis-of-variance and post hoc tests applying the Bonferroni correction for multiple comparisons. \*\*=p<0.01 and \*\*\*\*= p<0.0001 compared to the indicated group. Source data are provided as a Source Data file.

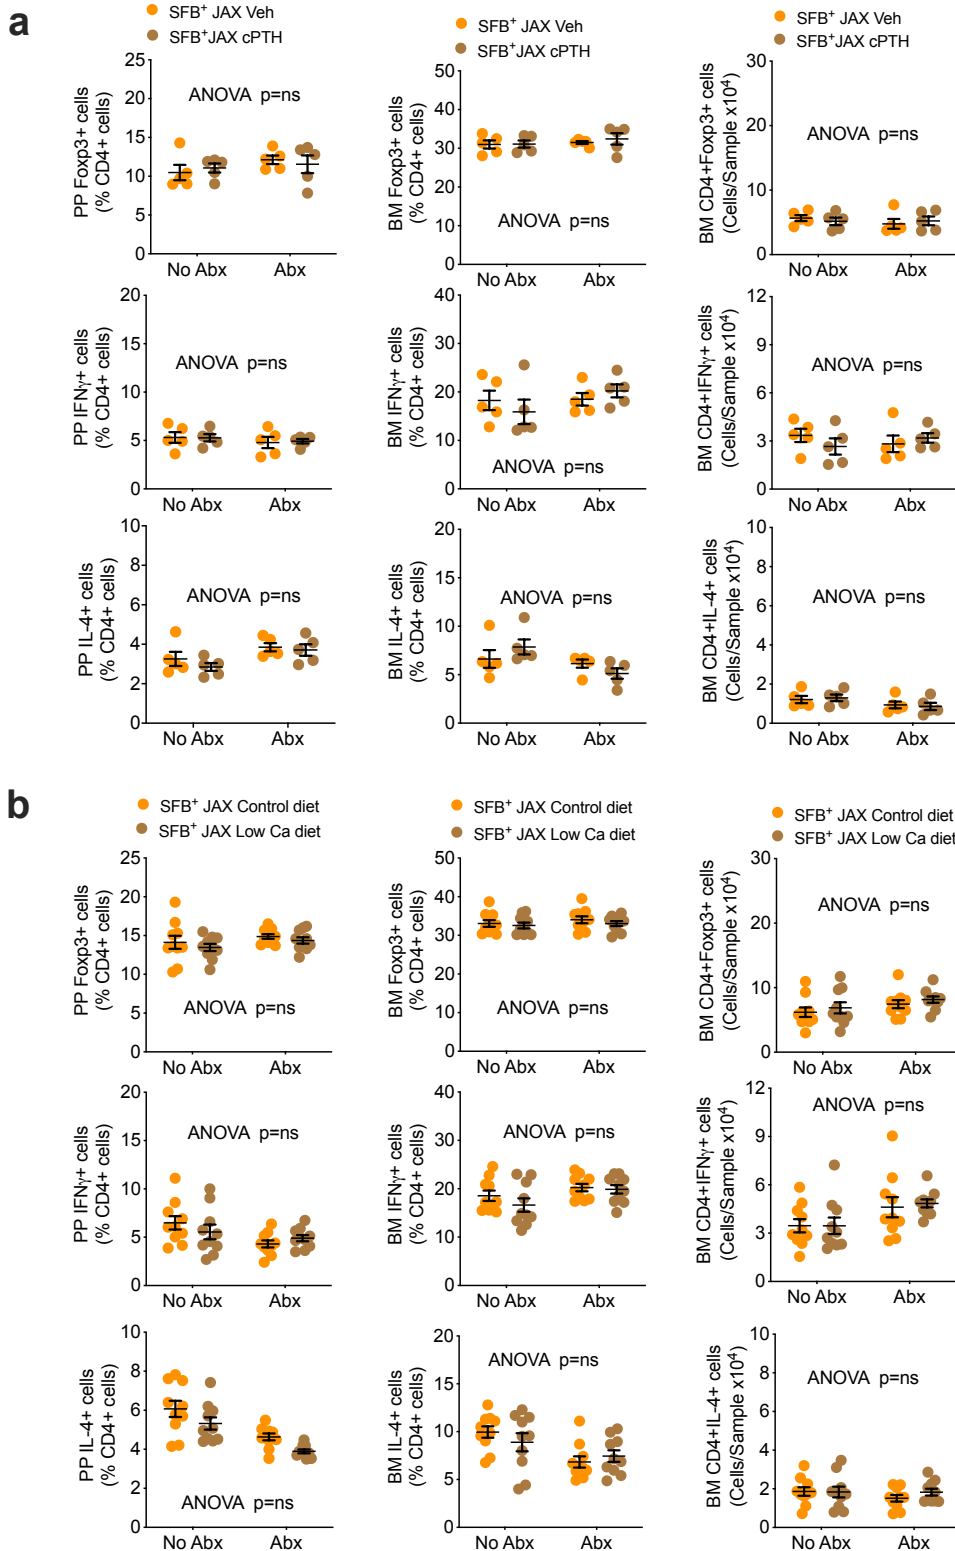

**Supplemental Figure 7. cPTH and low calcium diet do not affect the frequency of PP and BM Fcγ3+ CD4+ T cells, IFN $\gamma$ + CD4+ T cells and IL-4+ CD4+ T cells. cPTH and Low calcium diet did not affect the frequency of PP and BM Fcγ3+ T cells, IFN $\gamma$ + T cells and IL-4+ T cells. a. PP and BM Fcγ3+ T cells, PP and BM IFN $\gamma$ + T cells and PP and BM IL-4+ T cells in SFB+ JAX mice treated with vehicle or cPTH for 2 weeks, n= 5 mice per group. b. PP and BM Fcγ3+ T cells, PP and BM IFN $\gamma$ + T cells and PP and BM IL-4+ T cells in SFB+ JAX mice treated with control diet or low calcium diet for 4 weeks. All animals were treated with antibiotics (Abx) or without antibiotics (No Abx), n= 10 mice per group. Data are expressed as Mean  $\pm$  SEM. All data were normally distributed according to the Shapiro-Wilk normality test and analyzed by two-way analysis-of-variance and post hoc tests applying the Bonferroni correction for multiple comparisons. Source data are provided as a Source Data file.**



**Supplemental Table 1.** Primer sequences for real-time PCRs.

|                                     | <b>Forward primer sequence<br/>(5'-3')</b> | <b>Reverse primer sequence<br/>(5'-3')</b> |
|-------------------------------------|--------------------------------------------|--------------------------------------------|
| <b>Mouse <i>TNF</i></b>             | AACTCCAGGCGGTGCCT<br>AT                    | TGCCACAAGCAGGAATG<br>AGA                   |
| <b>Mouse <i>TGFβ1</i></b>           | CCACCTGCAAGACCATC<br>GAC                   | CTGGCGAGCCTTAGTTT<br>GGAC                  |
| <b>Mouse <i>IL-17A</i></b>          | TGACGCCACCTACAAC<br>ATC                    | CATCATGCAGTTCCGTCA<br>GC                   |
| <b>Mouse <i>CCL20</i></b>           | GCCTCTCGTACATACAG<br>ACGC                  | CCAGTTCTGCTTTGGATC<br>AGC                  |
| <b>Mouse <i>IL-1β</i></b>           | TTCAGGCAGGCAGTATC<br>ACTC                  | GAAGGTCCACGGGAAAG<br>ACAC                  |
| <b>Mouse <i>IL-6</i></b>            | TAGTCCTTCCCTACCCCA<br>ATTTCC               | TTGGTCCTTAGCCACTCC<br>TTC                  |
| <b>18s ribosomal<br/>RNA</b>        | ATTCGAACGTCTGCCCT<br>ATCA                  | GTCACCCGTGGTCACCA<br>TG                    |
| <b>Total bacterial<br/>16S rRNA</b> | 515F<br>(GTGCCAGCMGCCGCG<br>GTAA)          | 806R<br>(GGACTACHVGGGTWTC<br>TAAT)         |
| <b>SFB 16S rRNA</b>                 | 736F<br>(GACGCTGAGGCATGAG<br>AGCAT)        | 844R<br>(GACGGCACGGATTGTTA<br>TTCA)        |
